# Supplementary material for: Hydrous nickel sulphide nanoparticle decorated 3D graphene foam electrodes for enhanced supercapacitive performance of an asymmetric device
Source: Royal Society of Chemistry journal article supplement (doi:10.1039/c8nj04228d), 2018-01-01
Supplement: c8nj04228d1.pdf [file c8nj04228d1.pdf]

## Supporting Information

### Hydrous Nickel Sulphide Nanoparticles Decorated 3D Graphene Foam Electrodes for Enhanced Supercapacitive Performance of Asymmetric Device

*Umakant M. Patil<sup>1\*</sup>, Pranav K. Katkar<sup>1</sup>, Supriya J. Marje<sup>1</sup>, Chandrakant D. Lokhande<sup>1</sup>,*

*Seong C. Jun<sup>2\*</sup>*

<sup>1</sup>Centre for Interdisciplinary Research, D. Y. Patil University, Kasaba Bawada,  
Kolhapur-416 006, (India).

<sup>2</sup>Nano-Electro Mechanical Device Laboratory, School of Mechanical Engineering,  
Yonsei University, Seoul 120-749, (South Korea).

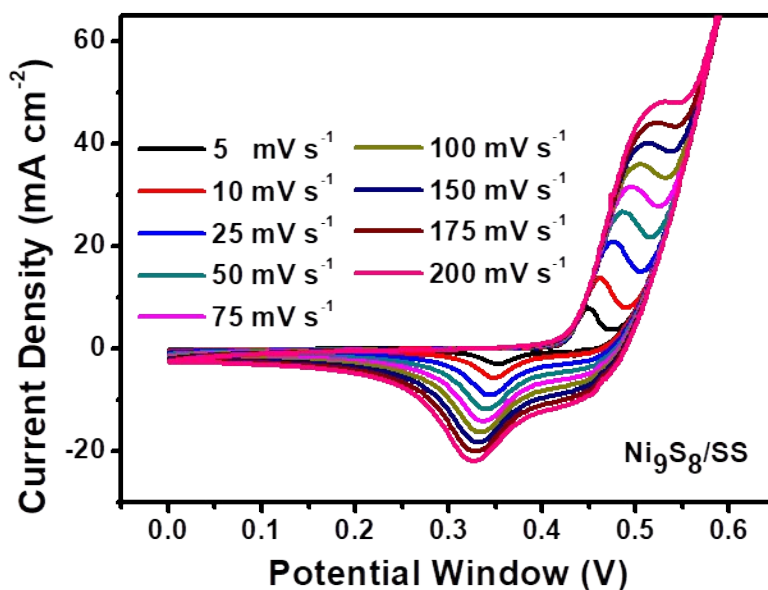

**Fig (S1):** Cyclic voltammety (CV) of Ni<sub>9</sub>S<sub>8</sub> nanoparticles on stainless steel (SS) at various scan rates (5 to 200 mVs<sup>-1</sup>)

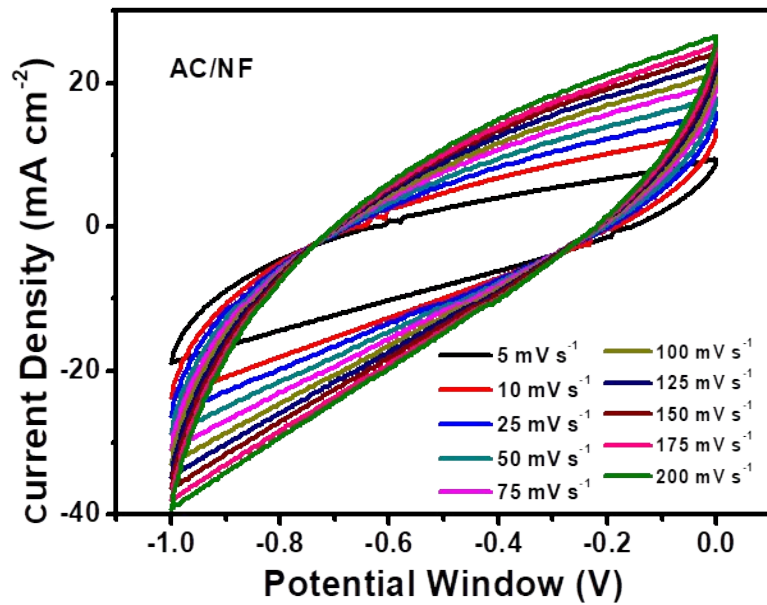

**Fig (S2):** cyclic voltammetry of activated carbon (AC) on nickel foam (NF) at various scan rates (5 to 200 mVs<sup>-1</sup>)

**Table (1):** Summary of capacitive performances for Ni<sub>9</sub>S<sub>8</sub> composites in supercapacitor.

| Sr. No. | Material and Nano-structure                        | Method for deposition        | Capacitance & current density                   | Energy density            | Power density              | Cycles | Stability (%) | Ref. |
|---------|----------------------------------------------------|------------------------------|-------------------------------------------------|---------------------------|----------------------------|--------|---------------|------|
| 1.      | NiS (Microflowers)                                 | Hydrothermal                 | 1122.7 Fg <sup>-1</sup> at 1 Ag <sup>-1</sup>   | 31 Wh Kg <sup>-1</sup>    | 0.9 kW kg <sup>-1</sup>    | 1000   | 97.8          | 1    |
| 2.      | NiS (Nanoframes)                                   | Heating treatment            | 2112 Fg <sup>-1</sup> at 1 Ag <sup>-1</sup>     | --                        | --                         | 4000   | 91.8          | 2    |
| 3.      | NiS/CR's (Nanoparticles)                           | Solvothermal                 | 1092 Fg <sup>-1</sup> at 1 Ag <sup>-1</sup>     | --                        | --                         | 2000   | 100           | 3    |
| 4.      | NiS/GO (Nanoparticles)                             | Hydrothermal                 | 800 Fg <sup>-1</sup> at 1 Ag <sup>-1</sup>      | 111.1 Wh Kg <sup>-1</sup> | 499.5 W kg <sup>-1</sup>   | 1000   | --            | 4    |
| 5.      | rGO/Ni <sub>3</sub> S <sub>2</sub> (Nanoparticles) | Spray technique              | 1424 Fg <sup>-1</sup> at 0.75 Ag <sup>-1</sup>  | --                        | --                         | 3000   | 67.5          | 5    |
| 6.      | NiS/GNS/CNT (Nanotubes)                            | Hydrothermal                 | 2377 Fg <sup>-1</sup> at 2 mVs <sup>-1</sup>    | 14 Wh kg <sup>-1</sup>    | 16 kWh kg <sup>-1</sup>    | 1000   | 32            | 6    |
| 7.      | NiS/rGO (Nanoflakes)                               | hydrothermal                 | 1312 Fg <sup>-1</sup> at 5 mVs <sup>-1</sup>    | 17.01 Wh kg <sup>-1</sup> | 2285.36 W kg <sup>-1</sup> | 500    | 86            | 7    |
| 8.      | NiS (Nanoflakes)                                   | CBD                          | 750 Fg <sup>-1</sup> at 5 mVs <sup>-1</sup>     | 28 Wh kg <sup>-1</sup>    | 4.98 kW kg <sup>-1</sup>   | 3000   | 85.3          | 8    |
| 9.      | NiS/G (Nanoflakes)                                 | hydrothermal                 | 187.53 Fg <sup>-1</sup> at 10 mVs <sup>-1</sup> | --                        | --                         | 1000   | --            | 9    |
| 10.     | NiS (Nanoparticles)                                | Microwave assisted method    | 845 Fg <sup>-1</sup> at 1 Ag <sup>-1</sup>      | --                        | --                         | 1000   | 81.6          | 10   |
| 11.     | NiS/rGO (Nanoparticles)                            | Hydrothermal                 | 852 Fg <sup>-1</sup> at 2 Ag <sup>-1</sup>      | --                        | --                         | 1000   | 82            | 11   |
| 12.     | Ni <sub>3</sub> S <sub>2</sub> (Nanoflakes)        | Potential-dynamic deposition | 664 Fg <sup>-1</sup> at 4 Ag <sup>-1</sup>      | --                        | --                         | 1000   | 91            | 12   |
| 13.     | NiS/rGO (Nanospheres)                              | Hydrothermal                 | 1169 Fg <sup>-1</sup> at % Ag <sup>-1</sup>     | --                        | --                         | 1000   | 77.9          | 13   |
| 14.     | Ni <sub>3</sub> S <sub>2</sub> (Nanoarray)         | Hydrothermal                 | 694 Fg <sup>-1</sup> at 3.45 Ag <sup>-1</sup>   | 1.96 mWhcm <sup>-3</sup>  | 0.6 w cm <sup>-3</sup>     | 5000   | 89.3          | 14   |
| 15.     | NiS/rGO (Nanorods)                                 | Hydrothermal                 | 579 Fg <sup>-1</sup> at 5 Ag <sup>-1</sup>      | --                        | --                         | 2000   | 90.90         | 15   |
| 16.     | Ni <sub>3</sub> S <sub>2</sub> -NiS (Nanowires)    | Hydrothermal                 | 1077.3 Fg <sup>-1</sup> at 5 Ag <sup>-1</sup>   | --                        | --                         | 10000  | 76.3          | 16   |
| 17.     | Ni <sub>3</sub> S <sub>2</sub> /CNT (Nanosheets)   | CVD                          | 514 Fg <sup>-1</sup> at 4 Ag <sup>-1</sup>      | --                        | --                         | 1500   | 88            | 17   |
| 18.     | V <sub>2</sub> O <sub>5</sub> (Flakes)             | CBD                          | 735 F g <sup>-1</sup> at 1 mV s <sup>-1</sup>   | --                        | --                         | 1000   | 71            | 18   |

|            |                                                        |            |                                                  |                                 |                              |      |    |                     |
|------------|--------------------------------------------------------|------------|--------------------------------------------------|---------------------------------|------------------------------|------|----|---------------------|
| 19.        | V <sub>2</sub> O <sub>5</sub> /MWCNTs (Flakes)         | CBD        | 629 F g <sup>-1</sup> at 2 A g <sup>-1</sup>     | --                              | --                           | 4000 | 93 | 19                  |
| 20.        | Fe <sub>2</sub> O <sub>3</sub> /MWCNTs (Nanoparticles) | SILAR      | 431 F g <sup>-1</sup> at 5 mV s <sup>-1</sup>    | 38.89 Wh kg <sup>-1</sup>       | 800 W kg <sup>-1</sup>       | 500  | 65 | 20                  |
| <b>21.</b> | <b>Ni<sub>9</sub>S<sub>8</sub>/GF (Nanoparticles)</b>  | <b>CBD</b> | <b>2055 Fg<sup>-1</sup> at 2 Ag<sup>-1</sup></b> | <b>45.66 Wh Kg<sup>-1</sup></b> | <b>407 W kg<sup>-1</sup></b> | --   | -- | <b>Present work</b> |

**Table (2):** Summary for Ni<sub>9</sub>S<sub>8</sub> and asymmetric device performance in supercapacitor.

| Sr. No.    | Material                                                                     | Method for deposition       | Capacitance & current density                   | Energy density                  | Power density                  | Cycles  | Stability % | Ref.                |
|------------|------------------------------------------------------------------------------|-----------------------------|-------------------------------------------------|---------------------------------|--------------------------------|---------|-------------|---------------------|
| 1.         | NiS//AC                                                                      | Hydrothermal                | 69.1 Fg <sup>-1</sup> at 1 Ag <sup>-1</sup>     | 31 Wh Kg <sup>-1</sup>          | 0.9 kW kg <sup>-1</sup>        | 1000    | 48.8        | 1                   |
| 2.         | NiS/GNS/CNT//AC                                                              | Hydrothermal                | --                                              | 14 Wh kg <sup>-1</sup>          | 16 kWh kg <sup>-1</sup>        | 1000    | --          | 6                   |
| 3.         | NiS/rGO//ZIF-8 derived carbon                                                | Hydrothermal                | 47.85 Fg <sup>-1</sup> at 2 Ag <sup>-1</sup>    | 17.01 Wh kg <sup>-1</sup>       | 10 kW kg <sup>-1</sup>         | --      | 78.91       | 7                   |
| 4.         | NiS//NiS                                                                     | CBD                         | 104 Fg <sup>-1</sup> at 5 mVs <sup>-1</sup>     | 28 Wh kg <sup>-1</sup>          | 4.98 kW kg <sup>-1</sup>       | 3000    | 85.3        | 8                   |
| 5.         | NiS/rGO//AC                                                                  | Hydrothermal                | 79.7 Fg <sup>-1</sup> at 0.2 Ag <sup>-1</sup>   | 18.7 Wh kg <sup>-1</sup>        | 124 W kg <sup>-1</sup>         | 1000    | --          | 11                  |
| 6.         | V <sub>2</sub> O <sub>5</sub> //V <sub>2</sub> O <sub>5</sub>                | CBD                         | 358 F g <sup>-1</sup> at 1 mV s <sup>-1</sup>   | 43 Wh kg <sup>-1</sup>          | 900 W kg <sup>-1</sup>         | 1000    | 88          | 18                  |
| 7.         | V <sub>2</sub> O <sub>5</sub> /MWCNT/ / V <sub>2</sub> O <sub>5</sub> /MWCNT | CBD                         | 160 F g <sup>-1</sup> at 1 A g <sup>-1</sup>    | 72.07 Wh kg <sup>-1</sup>       | 2.3 kW kg <sup>-1</sup>        | 4000    | 96          | 19                  |
| 8.         | PG-MSCs (Nanosheets)                                                         | Filtration                  | 9.8 mF cm <sup>-2</sup> at 5 mV s <sup>-1</sup> | 11.6 mWh cm <sup>-3</sup>       | --                             | 2000    | 89.5        | 21                  |
| 9.         | Ti <sub>3</sub> C <sub>2</sub> T <sub>x</sub> MXene (Nanosheet)              | Vacuum-assistant filtration | 126 F g <sup>-1</sup> at 100 A g <sup>-1</sup>  | --                              | --                             | 100,000 | 92.4        | 22                  |
| 10.        | NixSy/rGO//G                                                                 | Hydrothermal                | --                                              | 46 Wh kg <sup>-1</sup>          | 1.8 kW kg <sup>-1</sup>        | 5000    | 80          | 23                  |
| <b>11.</b> | <b>Ni<sub>9</sub>S<sub>8</sub>/GF//AC/NF</b>                                 | <b>CBD</b>                  | <b>143.7 at 3.0 A g<sup>-1</sup></b>            | <b>51.11 Wh Kg<sup>-1</sup></b> | <b>2.66 kW kg<sup>-1</sup></b> | --      | --          | <b>Present work</b> |

## Reference:

- 1) B. Guan, Y. Li, B. Yin, K. Liu, D. Wang, H. Zhang, C. Cheng, *Chem. Eng. J.*, 2017, **308**, 1165-1173.
- 2) X. Y. Yu, L. Yu, H. B. Wu, X. W. (David) Lou, *Angew. Chem.*, 2015, **127**, 1-6.
- 3) C. Sun, M. Ma, J. Yang, Y. Zhang, P. Chen, W. Huang, X. Dong, *Sci. Rep.*, 2014, **4**, 1-6.
- 4) A. Wang, H. Wang, S. Zhang, C. Mao, J. Song, H. Niu, B. Jin, Y. Tian, *Appl. Surf. Sci.*, 2013, **282**, 704-708.
- 5) H. Zhang, X. Yu, D. Guo, B. Qu, M. Zhang, Q. Li, T. Wang, *ACS Appl. Mater. Interfaces*, 2013, **5**, 7335-7340.
- 6) H. Chen, J. Li, C. Long, T. Wei, G. Ning, J. Yan, Z. Fan, *J. Marine Sci. Appl.*, 2014, **13**, 462-466.
- 7) P. R. Jothi, R. R. Salunkhe, M. Pramanik, S. Kannan, Y. Yamauchi, *RSC Adv.*, 2016, **6**, 21246-21253.
- 8) A. M. Patil, V. C. Lokhande, A. C. Lokhande, N. R. Chodankar, T. Ji, J. H. Kim, C. D. Lokhande, *RSC Adv.*, 2016, **6**, 68388-68401.
- 9) C. A. Pandey, S. Ravuri, R. Ramachandran, R. Santhosh, S. Ghosh, S. R. Sitaraman, A. N. Grace, *Int. J. Nanosci.*, 2017, **16**, 1-7.
- 10) L. Peng, X. Ji, H. Wan, Y. Ruan, K. Xu, C. Chen, L. Miao, J. Jiang, *Electrochim. Acta*, 2015, **182**, 361-367.
- 11) F. Cai, R. Sun, Y. Kang, H. Chen, M. Chen, Q. Li, *RSC Adv.*, 2015, **5**, 23073-23079.
- 12) S. W. Chou, J. Y. Lin, *J. Electrochem. Soc.*, 2013, **160**, D178-D182.
- 13) Z. Xing, Q. Chu, X. Ren, J. Tian, A. M. Asiri, K. A. Alamry, A. O. Al-Youbi, X. Sun, *Electrochem. Commun.*, 2013, **32**, 9-13.
- 14) X. Xiong, B. Zhao, D. Ding, D. Chen, C. Yang, Y. Lei, M. Liu, *NPG Asia Mater.*, 2016, **8**, 1-7.
- 15) J. Yang, X. Duan, W. Guo, D. Li, H. Zhang, W. Zhengn, *Nano Energy*, 2014, **5**, 74-81.
- 16) X. Zang, Z. Dai, J. Yang, Y. Z. Zhang, W. Huang, X. C. Dong, *ACS Appl. Mater. Interfaces*, 2016, **8**, 24645-24651.
- 17) T. Zhu, H. B. Wu, Y. Wang, R. Xu, X. W. (David) Lou, *Adv. Energy Mater.*, 2012, **2**, 1497-1502.

- 18) B. Pandit, D. P. Dubal, B. R. Sankapal, *Electrochim. Acta*, 2017, **242**, 382-389.
- 19) B. Pandit, D. P. Dubal, P. G. Romero, B. B. Kale, B. R. Sankapal, *Sci. Rep.*, 2017, **7**, 1-12.
- 20) S. S. Raut, B. R. Sankapal, *New J. Chem.*, 2016, **40**, 2619-2627.
- 21) H. Xiao, Z. S. Wu, L. Chen, F. Zhou, S. Zheng, W. Ren, H. M. Cheng, X. Bao, *ACS Nano*, 2017, **11**, 7284-7292.
- 22) L. Yu, L. Hu, B. Anasori, Y. T. Liu, Q. Zhu, P. Zhang, Y. Gogotsi, B. Xu, *ACS Energy Lett.*, 2018, **3**, 1597-1603.
- 23) S. Dai, B. Zhao, C. Qu, D. Chen, D. Dang, B. Song, B. M. deGlee, J. Fu, C. Hu, C. P. Wong, M. Liu, *Nano Energy*, 2017, **33**, 522-531.
